# Supplementary material
Source: PubMed Central journal article supplement (PMC3887441)
Supplement: Supp_Fig1.pdf [file Supp_Fig1.pdf]

## Supplementary Data

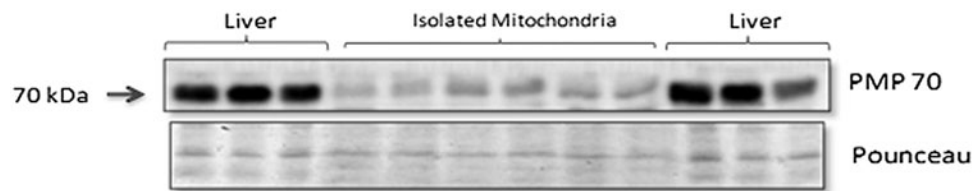

**SUPPLEMENTARY FIG. S1.** Expression of PMP 70 in mitochondrial suspension. Liver homogenates were used as positive controls.
