# Supplementary material
Source: PubMed Central journal article supplement (PMC3887441)
Supplement: Supp_Fig2.pdf [file Supp_Fig2.pdf]

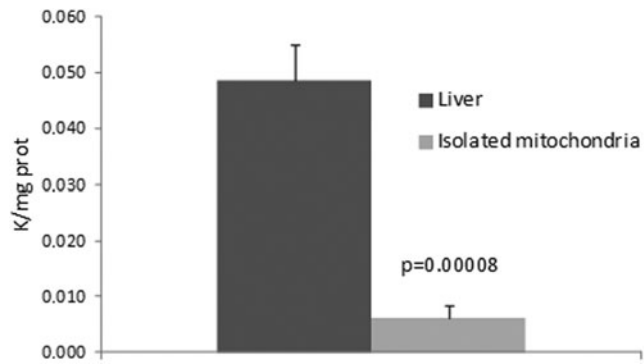

**SUPPLEMENTARY FIG. S2. Catalase activity in isolated mitochondria versus liver homogenates.** Data are expressed as mean  $\pm$  SD of four to five different experiments. The statistical significance is  $p=0.00008$ .
