# Supplementary material
Source: PubMed Central journal article supplement (PMC3887441)
Supplement: Supp_Fig3.pdf [file Supp_Fig3.pdf]

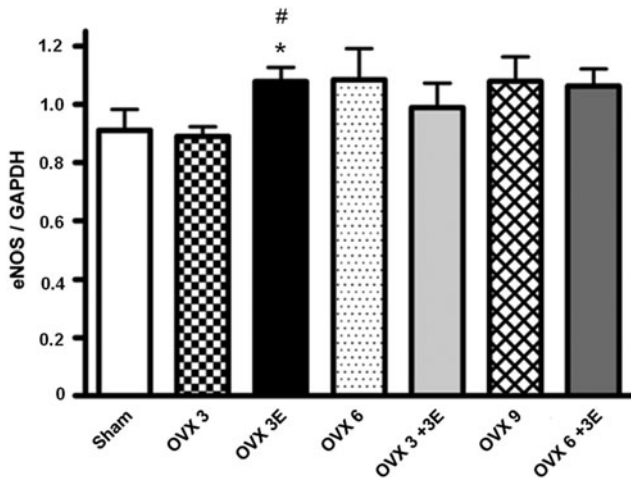

**SUPPLEMENTARY FIG. S3. Expression of eNOS in the brain.** Data are expressed as mean  $\pm$  SD of five to eight different experiments. The statistical significance is expressed as  $*p < 0.05$  versus control;  $^{\#}p < 0.05$  versus OVX 3. eNOS, endothelial nitric oxide synthase; OVX 3, ovariectomized for 3 weeks.
