# Supplementary material
Source: PubMed Central journal article supplement (PMC3887441)

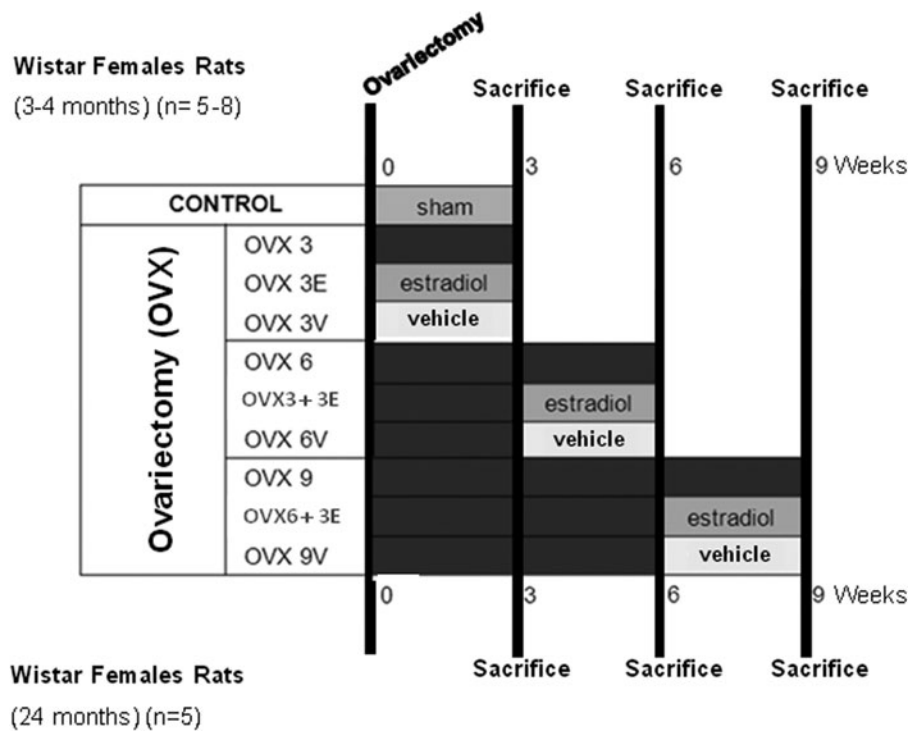

SUPPLEMENTARY FIG. S4. Experimental design of the study.

Supplement: Supp_Fig4.pdf [file Supp_Fig4.pdf]
